# Supplementary material for: Lactobacillus fermentum MCC2759 and MCC2760 Alleviate Inflammation and Intestinal Function in High-Fat Diet-Fed and Streptozotocin-Induced Diabetic Rats
Source: PubMed Central journal article supplement (PMC8342349; doi:10.1007/s12602-021-09744-0), 2021-02-11
Supplement: 12602_2021_9744_MOESM1_ESM.pdf [file 12602_2021_9744_MOESM1_ESM.pdf]

1 ***Lactobacillus fermentum* MCC2759 and MCC2760 alleviate inflammation and intestinal function in high-**  
2 **fat diet-fed and streptozotocin-induced diabetic rats**

3 **Ann Catherine Archer<sup>1</sup>, Serva Peddha Muthukumar<sup>2</sup>, Prakash Motiram Halami<sup>1\*</sup>**

4 1Microbiology and Fermentation Technology Department,

5 2Department of Biochemistry,

6 CSIR-Central Food Technological Research Institute, Mysuru-570020, India

7

8

9 \*Corresponding author

10 **Mailing address:** Microbiology and Fermentation Technology Department,

11 CSIR-Central Food Technological Research Institute, Mysuru-570020, India.

12 Phone: +91-821-2517539 Fax: +91-821-2517233.

13 E-mail address: prakashalami@cftri.res.in (Halami PM).

14

15

16

17

18

19

20

21

22

23

24

25

26

27

28

29

30

31

32

33

34

35

36

37

38 **Supplementary data 1: Composition of high fat diet (D12492, Research diets Inc.)**

39

40

41

42

43

44

45

46

47

48

49

50

51

52

53

54

55

56

57

58

| <b>Ingredient</b>   | <b>Weight in g/1000 g</b> | <b>Kcal</b> |
|---------------------|---------------------------|-------------|
| Casein              | 200                       | 800         |
| L-cysteine          | 3                         | 12          |
| Maltodextrin 10     | 125                       | 500         |
| Sucrose             | 68.8                      | 275.2       |
| Cellulose           | 50                        | 0           |
| Soybean oil         | 25                        | 225         |
| Lard                | 245                       | 2205        |
| Mineral mix         | 10                        | 0           |
| Dicalcium phosphate | 13                        | 0           |
| Calcium carbonate   | 5.5                       | 0           |
| Potassium citrate   | 16.5                      | 0           |
| Vitamin mix         | 10                        | 40          |
