# Supplementary material for: Lactobacillus fermentum MCC2759 and MCC2760 Alleviate Inflammation and Intestinal Function in High-Fat Diet-Fed and Streptozotocin-Induced Diabetic Rats
Source: PubMed Central journal article supplement (PMC8342349; doi:10.1007/s12602-021-09744-0), 2021-02-11
Supplement: 12602_2021_9744_MOESM2_ESM.pdf [file 12602_2021_9744_MOESM2_ESM.pdf]

1 *Lactobacillus fermentum* MCC2759 and MCC2760 alleviate inflammation and intestinal function in high-  
2 fat diet-fed and streptozotocin-induced diabetic rats

3 Ann Catherine Archer<sup>1</sup>, Serva Peddha Muthukumar<sup>2</sup>, Prakash Motiram Halami<sup>1\*</sup>

4 <sup>1</sup>Microbiology and Fermentation Technology Department,

5 <sup>2</sup>Department of Biochemistry,

6 CSIR-Central Food Technological Research Institute, Mysuru-570020, India

7

8

9 \*Corresponding author

10 **Mailing address:** Microbiology and Fermentation Technology Department,

11 CSIR-Central Food Technological Research Institute, Mysuru-570020, India.

12 Phone: +91-821-2517539 Fax: +91-821-2517233.

13 E-mail address: prakashalami@cftri.res.in (Halami PM).

14

15

16

17

18

19

20

21

22

23

24

25

26

27

28

29

30

31

32

33

34

35

36 **Supplementary data 2: List of primers used in this study**

| Target gene   | Primer pair       | Primer Sequences (5' → 3') | Amplicon size (bp) | Annealing temperature (°C) | Purpose            | Reference             |
|---------------|-------------------|----------------------------|--------------------|----------------------------|--------------------|-----------------------|
| TNF- $\alpha$ | RNTNF- $\alpha$ F | CAGATGGGCTGTACCTTATC       | 125                | 60                         | anti-inflammatory  | This study            |
|               | RNTNF- $\alpha$ R | AGAGGAGGCTGACTTTCT         |                    |                            |                    |                       |
| IL-1 $\beta$  | RNIL-1 $\beta$ F  | CCTGTCCTGTGTGATGAAAG       | 147                | 60                         | anti-inflammatory  | This study            |
|               | RNIL-1 $\beta$ R  | AACTGTGCAGACTCAAACCTC      |                    |                            |                    |                       |
| IL-6          | RNIL-6F           | CCTCTTGGGACTGATGTTG        | 128                | 60                         | anti-inflammatory  | This study            |
|               | RNIL-6R           | AATTAAGCCTCCGACTTGTG       |                    |                            |                    |                       |
| IL-12         | RNIL-12F          | CATCCAGCGCAAGAAAGA         | 144                | 60                         | anti-inflammatory  | This study            |
|               | RNIL-12R          | GAATTGTAGTAGCGGTCCTG       |                    |                            |                    |                       |
| IL-10         | RNIL-10F          | GGAGTGAAGACCAGCAAAGG       | 155                | 60                         | anti-inflammatory  | Distrutti et al. [54] |
|               | RNIL-10R          | GGCAACCCAAGTAACCCCTTA      |                    |                            |                    |                       |
| GAPDH         | RNGAPDHF          | GCCTCCAAGGAGTAAGAAAC       | 140                | 60                         | endogenous control | This study            |
|               | RNGAPDHR          | GTCTGGGATGGAATTGTGAG       |                    |                            |                    |                       |
| TLR4          | TLR4F             | ATCATCCAGGAAGGCTTCCA       | 180                | 60                         | probiotic MOA      | Jilling et al. [55]   |
|               | TLR4R             | GCTGCCTCAGCAAGGACTTCT      |                    |                            |                    |                       |
| ZO-1          | ZO-1F             | AGCGAAGCCACCTGAAGATA       | 139                | 60                         | probiotic MOA      | This study            |
|               | ZO-1R             | GATGGCCAGCAGGAATATGT       |                    |                            |                    |                       |
| CB1           | CB1F              | TTTCAAGCAAGGAGCACCCA       | 134                | 60                         | probiotic MOA      | This study            |
|               | CB1R              | GGTACGGAAGGTGGTGTCTG       |                    |                            |                    |                       |
| CB2           | CB2F              | TGATAGCCCGATAAGCCTTG       | 135                | 60                         | probiotic MOA      | This study            |
|               | CB2R              | TGCTATGGGAGACACAGCAG       |                    |                            |                    |                       |
| ADIPO         | ADIPOF            | CATTCCTGTCTGTACGAGTG       | 99                 | 60                         | probiotic MOA      | This study            |
|               | ADIPOR            | GGCAGGATTAAGAGGAACAG       |                    |                            |                    |                       |
| GLUT4         | GLUT4F            | GTCCCTACGTCTTCCTTCTA       | 149                | 60                         | probiotic MOA      | This study            |
|               | GLUT4R            | GTTTCACCTCCTGCTCTAAG       |                    |                            |                    |                       |
| GLP1          | GLP1F             | CAAGCTGTACCTGAGCATAG       | 142                | 60                         | probiotic MOA      | This study            |
|               | GLP1R             | GAATGGGCAAGCGTATGA         |                    |                            |                    |                       |

37 TNF-tumour necrosis factor; IL-interleukin; GAPDH-glyceraldehyde phosphate dehydrogenase; TLR-toll-like  
38 receptor; MOA-mode of action; ZO-zonal occludin; CB-endocannabinoid receptor; ADIPO-adiponectin; GLUT-  
39 glucose transporter; GLP-glucagon-like peptide; MOA-mode of action
